# Supplementary material
Source: PubMed Central journal article supplement (PMC8287965)
Supplement: NIHMS1705563-supplement-Supplementary_Fig_1.pdf [file NIHMS1705563-supplement-Supplementary_Fig_1.pdf]

Related to Extended Data Fig 1c

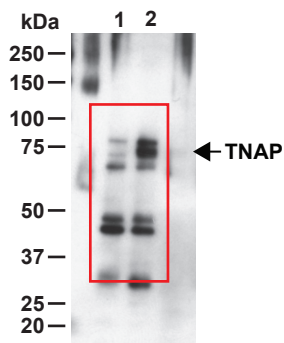

1: SEC fraction at 10 mL from RT BAT  
2: SEC fraction at 10 mL from Cold BAT

Note: multiple unspecific bands besides the TNAP band could be used as internal controls for loading.

Related to Extended Data Fig 3c

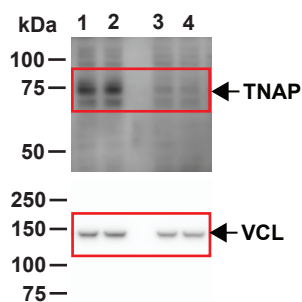

1: BAT Alpl fl/fl + AdGFP  
2: BAT Alpl fl/fl + AdGFP  
3: BAT Alpl fl/fl + AdCRE  
4: BAT Alpl fl/fl + AdCRE

Note: VCL is loaded on a separate gel as a sample preparation control.

Related to Extended Data Fig 3e

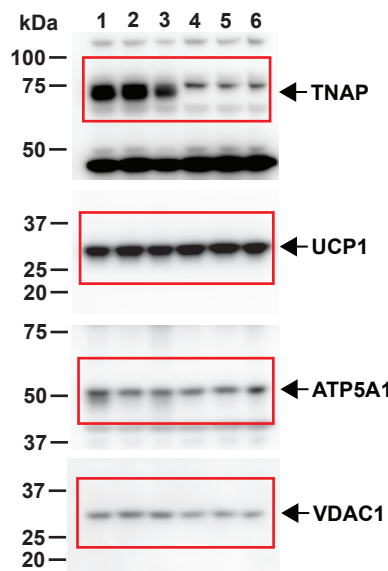

1: WT BAT Mito  
2: WT BAT Mito  
3: WT BAT Mito  
4: KO BAT Mito  
5: KO BAT Mito  
6: KO BAT Mito

Note: the samples derive from the same experiment but blots were processed in parallel.

Related to Extended Data Fig 3f

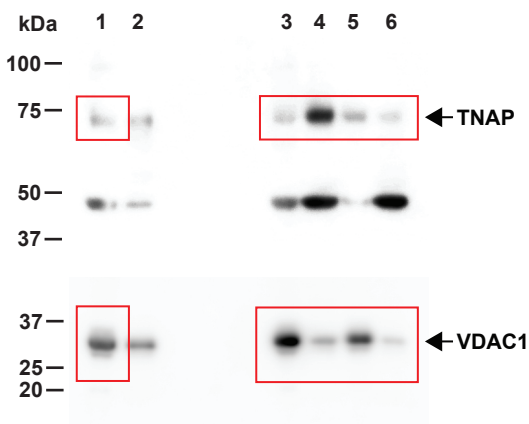

1: BAT Mito Ultracentrifuge Pellet  
2: BAT Non-Mito Ultracentrifuge Pellet  
3: PI-PLC-treated Ultracentrifuge Pellet  
4: PI-PLC-treated Ultracentrifuge Supernatant  
5: Non-PI-PLC-treated Ultracentrifuge Pellet  
6: Non-PI-PLC-treated Control Ultracentrifuge Supernatant

Note: VDAC1 is loaded on a separate gel.

Related to Extended Data Fig 4d

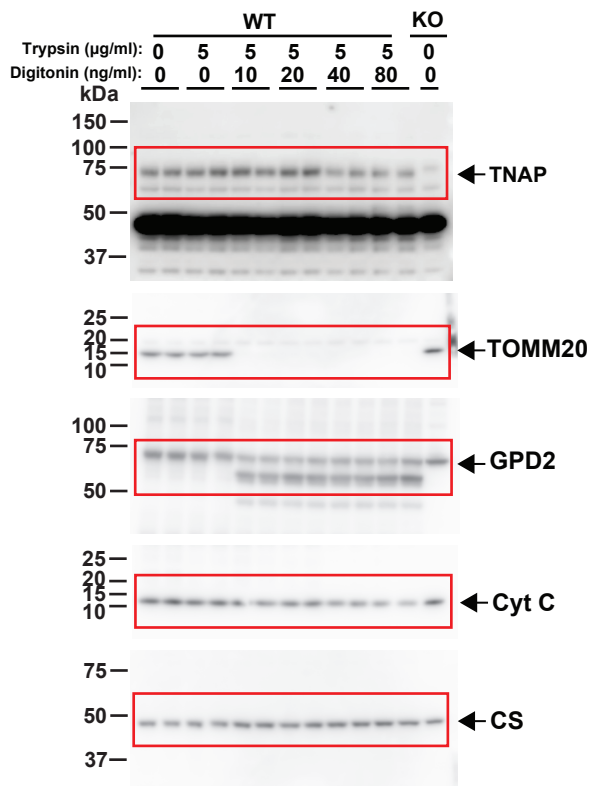

Note: the samples derive from the same experiment but blots were processed in parallel.

Related to Extended Data Fig 5b

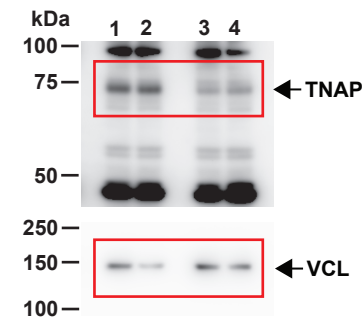

1: BAT shLacZ  
 2: BAT shLacZ  
 3: BAT shAlpl  
 4: BAT shAlpl

Note: VCL is loaded on a separate gel as a sample preparation control.

Related to Extended Data Fig 7b

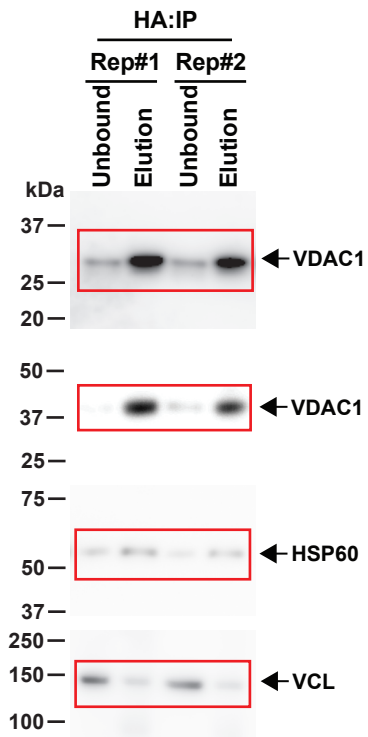

Note: the samples derive from the same experiment but blots were processed in parallel.

Related to Extended Data Fig 10b

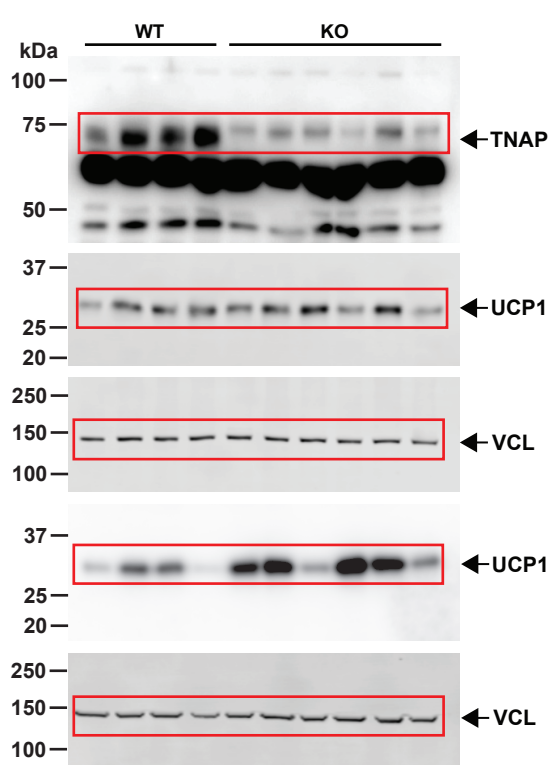

Note: the samples derive from the same experiment but blots were processed in parallel.
